# Supplementary material
Source: Springer Nature journal article supplement (https://www.springermedizin.de/resource/supplementary/12885_2012_3911_MOESM10_ESM.pdf/9464730)
Supplement: MOESM10 [file 9464730]

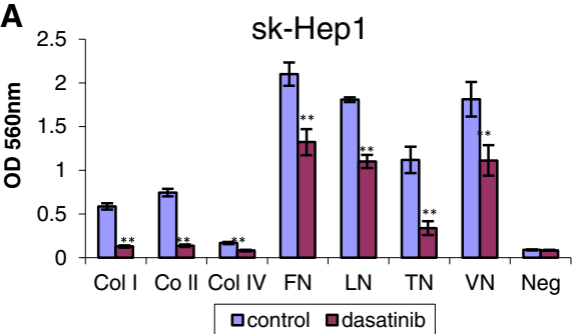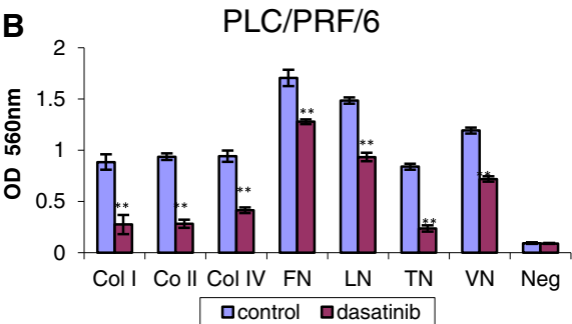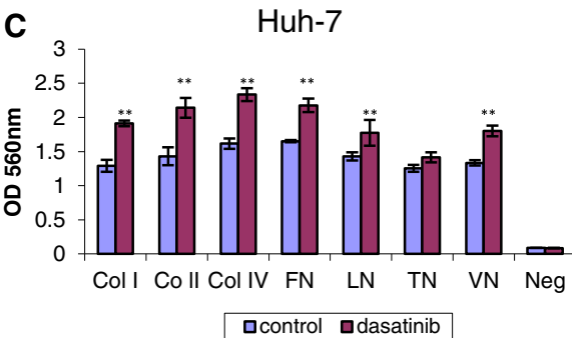

Col I: Collagen I

Col II: Collagen II

Col IV: Collagen IV

FN: Fibronectin

LN: Laminin

TN: Tenascin

VN: Vitronectin Neg: Negative
